# Supplementary material for: Winter hydrometeorological extreme events modulated by large-scale atmospheric circulation in southern Ontario
Source: Copernicus journal article supplement (doi:10.5194/esd-11-301-2020), 2020-03-26
Supplement: Supplementary file 1 [file esd-11-301-2020-supplement.pdf]

Supplement of Earth Syst. Dynam., 11, 301–318, 2020  
<https://doi.org/10.5194/esd-11-301-2020-supplement>  
© Author(s) 2020. This work is distributed under  
the Creative Commons Attribution 4.0 License.

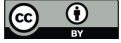

*Supplement of*

## **Winter hydrometeorological extreme events modulated by large-scale atmospheric circulation in southern Ontario**

**Olivier Champagne et al.**

*Correspondence to:* Olivier Champagne ([champago@mcmaster.ca](mailto:champago@mcmaster.ca))

The copyright of individual parts of the supplement might differ from the CC BY 4.0 License.

The two figures in this supplementary materials aim to compare the weather extreme events calculated from the bias-corrected CRCM5-LE data (Figure S1) and from the CRCM5-LE raw data (Figure S2). The weather extreme events calculated from the bias-corrected data show a better representation of the observations and are therefore used in the article.

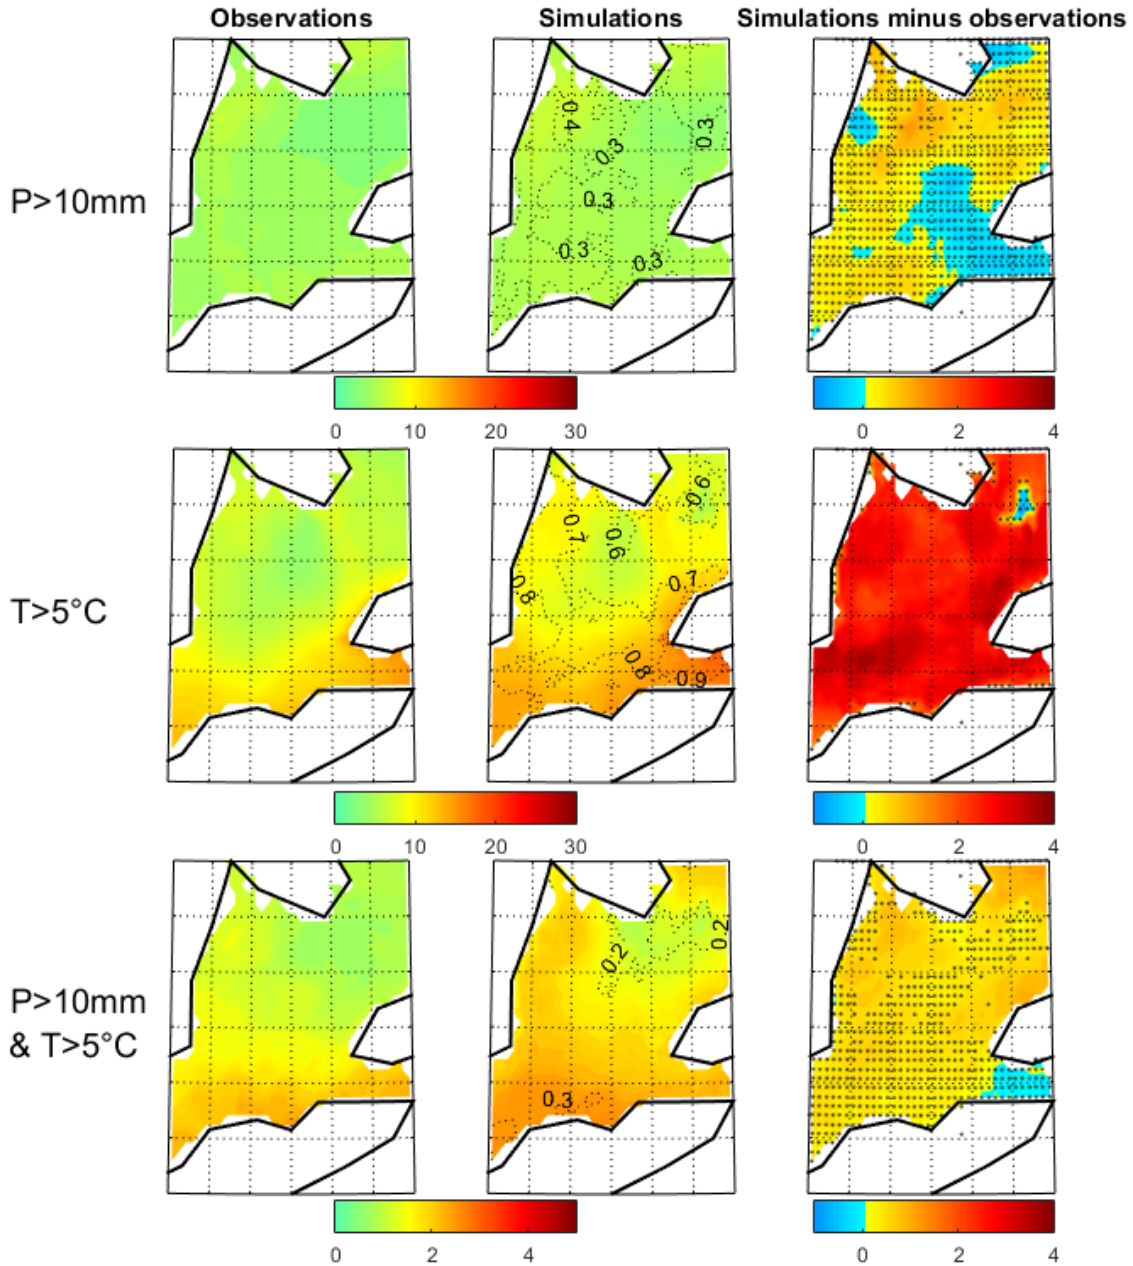

**Figure S1: DJF number of precipitation and warm extreme events in the historical period (1961-1990) for NRCANmet (left panels), bias corrected CRCM5-LE 50 members average (mid panels) and NRCANmet minus bias corrected CRCM5-LE (right panels). The dotted lines in the mid panels represent the standard deviation of the 50-members bias-corrected CRCM5-LE simulated number of events. Stippled regions in the right panels indicate where the observations lie within the CRCM5-LE ensemble spread.**

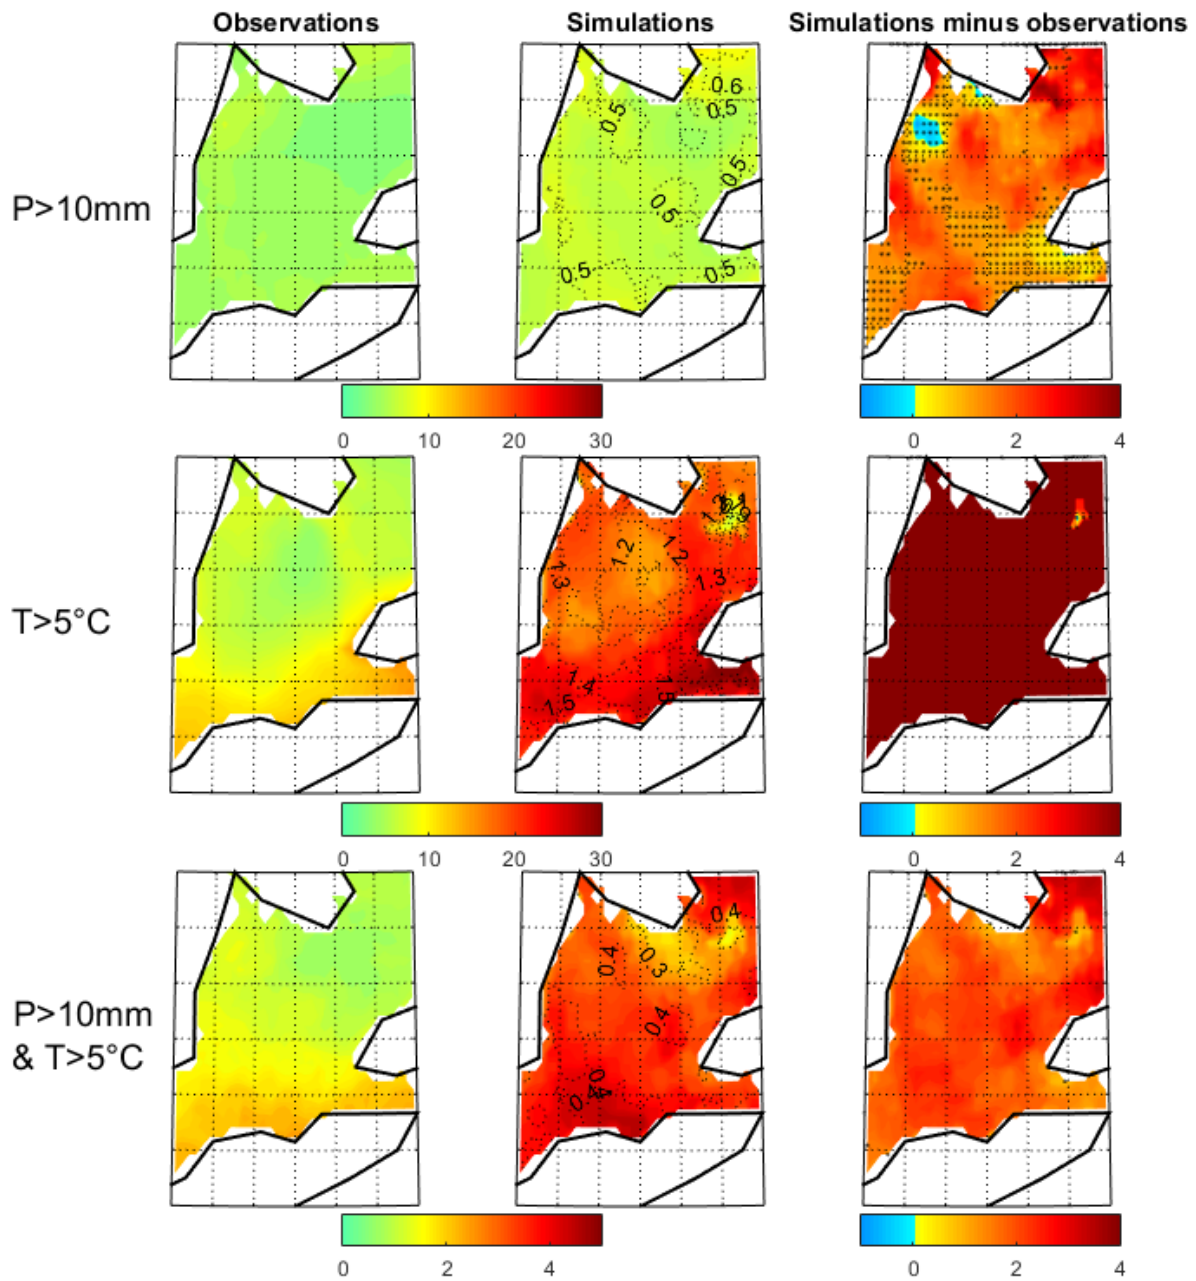

Figure S2: DJF number of precipitation and warm extreme events in the historical period (1961-1990) for NRCANmet (left panels), raw CRCM5-LE 50 members average (mid panels) and NRCANmet minus raw CRCM5-LE (right panels). The dotted lines in the mid panels represent the standard deviation of the 50-members raw CRCM5-LE simulated number of events. Stippled regions in the right panels indicate where the observations lie within the CRCM5-LE ensemble spread.
